# Supplementary material
Source: publisher site journal article supplement (https://www.dovepress.com/get_supplementary_file.php?f=218637.xlsx)
Supplement: Supplementary file 1 [file get_supplementary_file.php]

## Sheet: Table S1
		Supplementary, S1 Table. Classification of the Staphylococcus aureus nasal carriage state based on results of two, three, four, and five cultures.
			Results of cultures 1 and 2 (n=1,385)
			All negative	One positive	All postive	Total (%)
		All negative samples	714	-	-	51.6%
		Negative and positive samples	-	237	-	17.1%
		All positive samples	-	-	434	31.3%
		(%)	51.6%	17.1%	31.3%
		Time between samples, days	377 (148–917)	476 (196–1041)	329 (125–742)
		Gender, men (%)	56.9%	60.3%	69.6%
			Results of cultures 1, 2, and 3 (n=459)
			All negative	One positive	Two positive	All positive	Total (%)
		All negative samples	231	-	-	-	50.3%
		Negative and positive samples	-	66	-	-	25.1%
			-	-	49	-
		All positive samples	-	-	-	113	24.6%
		(%)	50.3%	14.4%	10.7%	24.6%
		Time between samples, days	576 (323–1171)	790 (378–1356)	618 (322–1297)	510 (273–1071)
		Gender, men (%)	58.4%	60.6%	69.4%	77.0%
			Results of cultures 1, 2, 3, and 4 (n=165)
			All negative	One positive	Two positive	Three positive	All positive	Total (%)
		All negative samples	83	-	-	-	-	50.3%
		Negative and positive samples	-	20	-	-	-	28.5%
			-	-	16	-	-
			-	-	-	11	-
		All positive samples	-	-	-	-	35	21.2%
		(%)	50.3%	12.1%	9.7%	6.7%	21.2%
		Time between samples, days	567 (363–1169)	1266 (567–1672)	627 (300–1382)	448 (349–1163)	581 (379–1217)
		Gender, men (%)	65.1%	65.0%	62.5%	63.5%	80.0%
			Results of cultures 1, 2, 3, 4, and 5 (n=76)
			All negative	One positive	Two positive	Three positive	Four positive	All positive	Total (%)
		All negative samples	41	-	-	-	-	-	53.9%
		Negative and positive samples	-	7	-	-	-	-	25.0%
			-	-	6	-	-	-
			-	-	-	4	-	-
			-	-	-	-	2	-
		All positive samples	-	-	-	-	-	16	21.1%
		(%)	54.0%	9.2%	7.9%	5.3%	2.6%	21.1%
		Time between samples, days	645 (406–1260)	937 (777–1526)	930 (391–1512)	997 (430–1494)	364 (266–462)	570 (454–836)
		Gender, men (%)	68.3%	100.0%	50.0%	75.0%	100.0%	87.5%
		Numbers and percentages or medians with interquartile ranges.
